# Supplementary material for: The synthesis of a core–shell MnO2/3D-ordered hollow carbon sphere composite and its superior electrochemical capability for lithium ion batteries
Source: Royal Society of Chemistry journal article supplement (doi:10.1039/c4ta00252k), 2014-01-01
Supplement: c4ta00252k1.pdf [file c4ta00252k1.pdf]

## Supplementary Information

# The Synthesis of Core-shell MnO<sub>2</sub>/3D-Ordered Hollow Carbon Sphere Composite and Its Superior Electrochemical Capability for Lithium Ion Battery

Zang Jun, Chen Jia-jia, Zhang Cheng-long, Qian Hang, Zheng Ming-sen\*, and Dong Quan-feng\*

Department of Chemistry, College of Chemistry and Chemical Engineering, Xiamen University, State Key Laboratory of Physical Chemistry of Solid Surfaces, Xiamen, Fujian, 361005, China. E-mail: [qfdong@xmu.edu.cn](mailto:qfdong@xmu.edu.cn); [mszheng@xmu.edu.cn](mailto:mszheng@xmu.edu.cn); Fax: +86-592-2183905; Tel: +86-592-2185905

### Experimental

**Synthesis of hollow carbon sphere (HCS).** The hollow carbon sphere (HCS) was obtained by templating against hard particles. Typically, 5.5 g resorcinol (R) and 9.5 ml formaldehyde (F) were dissolved in 30 mL water. The amount of PMMA emulsion was added into the solution. After hermetic in the 85 °C oven for 72 h, the precursor was sintered at 800 °C for 1 h under nitrogen atmosphere to get HCS. The PMMA template was prepared by emulsifier-free emulsion polymerization of methyl methacrylate monomer (MMA) at 76 °C with potassium persulfate (KPS) as an initiator.

**Synthesis of MnO<sub>2</sub>/HCS composites.** MnO<sub>2</sub>/HCS composites were prepared by a facile redox method. Typically, 30 mg of HCS and 100 mg of P123 were dispersed in 30 mL water. After stirring for 3 h, 39, 79, 158 and 600 mg (excess) of KMnO<sub>4</sub> were added into the solution, respectively. The solutions were incubated at 80 °C with continuous magnetic stirring for 3 h in a water bath, then filtrated and rinsed to get the final products.

**Materials characterization.** The crystal structure of the products was characterized by X-ray powder diffraction (Philips Panalytical X-pert, using Cu K $\alpha$ 1 radiation  $\lambda=1.5405$  Å). The morphology of the products was observed by field-emission scanning electron microscopy (SEM Hitachi S-4800, 10 KV) and transmission electron microscopy (TEM Hitachi JEM-2100, 200 KV). Compositional investigation of samples was carried out by X-ray photoelectron spectroscopy (XPS, PHI Quantera-2000). TGA was carried out on a Pyris Diamond TG-DTA (PE Co., US) to investigate the mass loading of MnO<sub>2</sub> in a constant flow of dry air (50 ml min<sup>-1</sup>) and a heating/cooling rate of 5 °C min<sup>-1</sup>. Alumina crucibles were loaded with 5-10 mg of sample powder. The as-prepared products were named MnO<sub>2</sub>/HCS-68%, MnO<sub>2</sub>/HCS-47%, MnO<sub>2</sub>/HCS-35% and pure MnO<sub>2</sub>.

**Electrochemical measurements.** Electrochemical measurements were carried out in CR2016 type coin cell. The working electrode was made up by 80wt% active materials, 10wt% super P and 10wt% water soluble polymer n-lauryl acrylate (LA Chengdu, China). The mass loading of the working electrode is about 1 mg (~0.8 mg cm<sup>-2</sup>). Cu foil was used as current collector and Li foil was used as counter electrode. 1 M LiPF<sub>6</sub> in ethylene carbonate, dimethyl carbonate and diethyl carbonate (EC/DMC/DEC, v/v/v=1:1:1) solution was used as the electrolyte.

Galvanostatic charge and discharge measurements were carried out in the voltage range between 0.01 and 3.0 V vs.  $\text{Li/Li}^+$  at different current densities using a Neware battery system (Shenzhen NEWARE Co., China). All the capacities calculated in this work are based on the whole mass of composites.

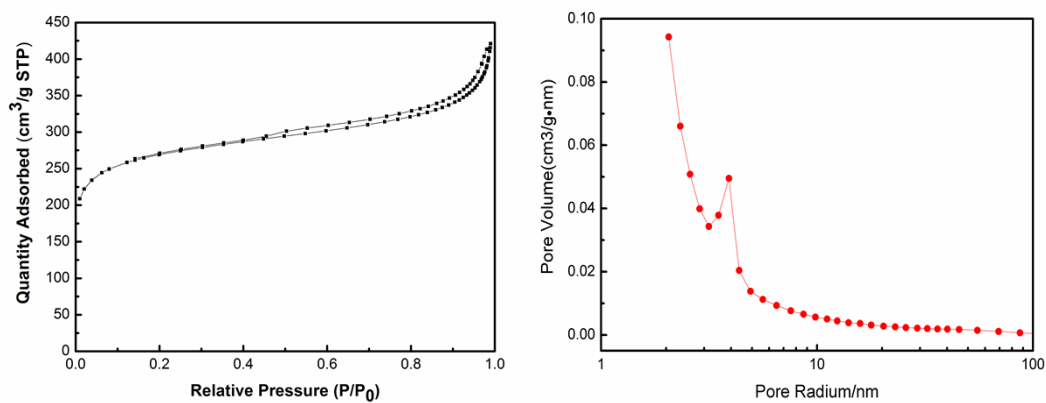

Fig. S1 N<sub>2</sub> adsorption-desorption isotherm and pore-size distribution of HCS.

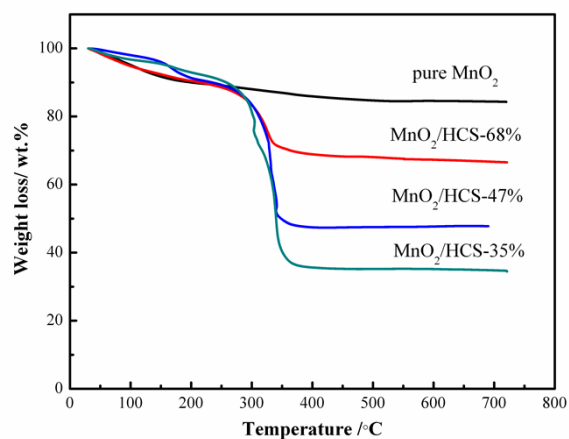

Fig. S2 TG curves of MnO<sub>2</sub>/HCS composites.

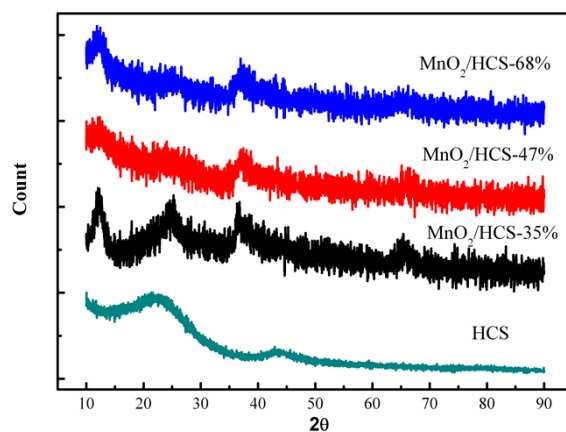

Fig. S3 XRD patterns of hollow carbon sphere (HCS) and MnO<sub>2</sub>/HCS composites.

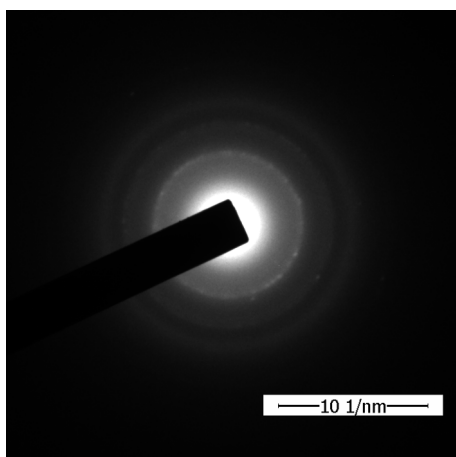

Fig. S4 SAED pattern of MnO<sub>2</sub>/HCS-47% composite.

The battery performances were tested by galvanostatic method in CR2016 coin cell. The theoretical capacity of MnO<sub>2</sub>/HCS composites can be described as following equation:

$$Q_{\text{capacity}} = a \cdot Q_{\text{MnO}_2} + (1-a) \cdot Q_{\text{HCS}}$$

Where the theoretical capacity  $Q_{\text{MnO}_2} = 1233 \text{ mAh g}^{-1}$ ,  $Q_{\text{HCS}} = 372 \text{ mAh g}^{-1}$  and  $a$  is the mass ratio of MnO<sub>2</sub> in MnO<sub>2</sub>/HCS composites.

**Table S1** comparative study of the stable capacity versus different MnO<sub>2</sub> mass loading at a current density of 0.1 A g<sup>-1</sup> after 100 cycles.

|                           | $a$ , MnO <sub>2</sub> mass loading (%) | theoretical capacity of MnO <sub>2</sub> /HCS composites | real capacity of MnO <sub>2</sub> /HCS composites | real capacity based on MnO <sub>2</sub> |
|---------------------------|-----------------------------------------|----------------------------------------------------------|---------------------------------------------------|-----------------------------------------|
| MnO <sub>2</sub> /HCS-68% | 68                                      | 957.5 mAh g <sup>-1</sup>                                | 330 mAh g <sup>-1</sup>                           | 332.6 mAh g <sup>-1</sup>               |
| MnO <sub>2</sub> /HCS-47% | 47                                      | 776.7 mAh g <sup>-1</sup>                                | 692.5 mAh g <sup>-1</sup>                         | 1107.5 mAh g <sup>-1</sup>              |
| MnO <sub>2</sub> /HCS-35% | 35                                      | 673.4 mAh g <sup>-1</sup>                                | 615 mAh g <sup>-1</sup>                           | 1154 mAh g <sup>-1</sup>                |

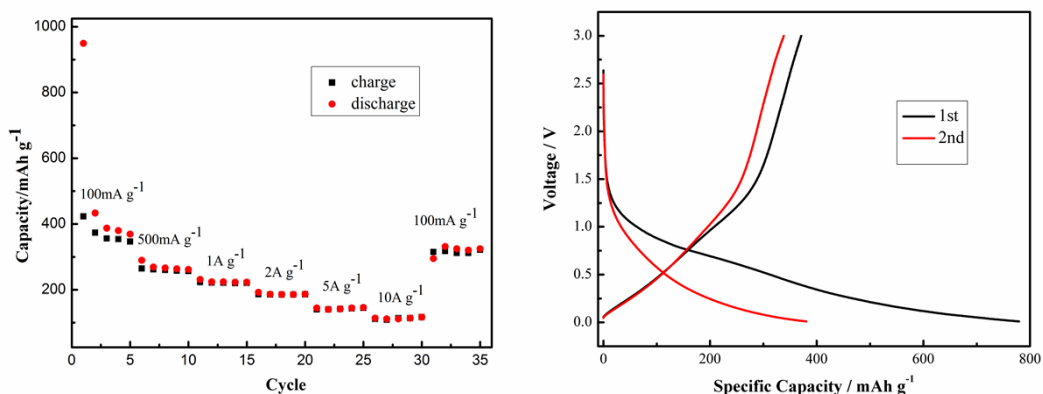

Fig. S5 Rate performance and discharge-charge curves of HCS.

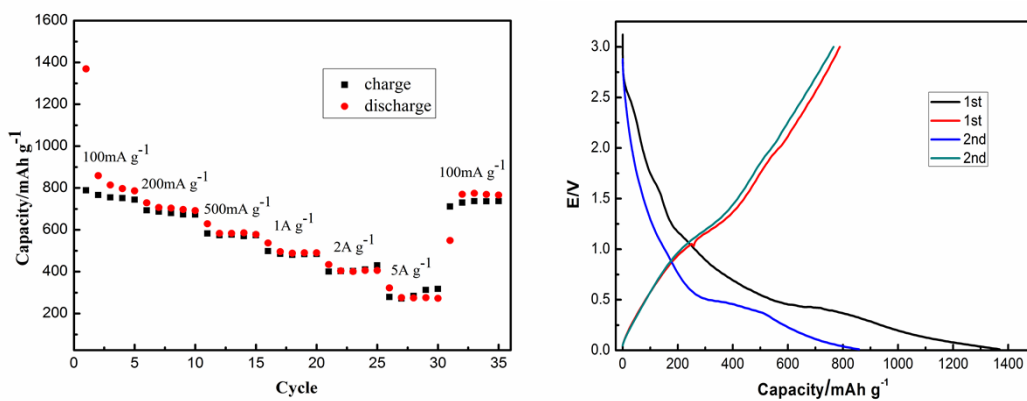

Fig. S6 Rate performance and discharge-charge curves of MnO<sub>2</sub>/HCS-47%.

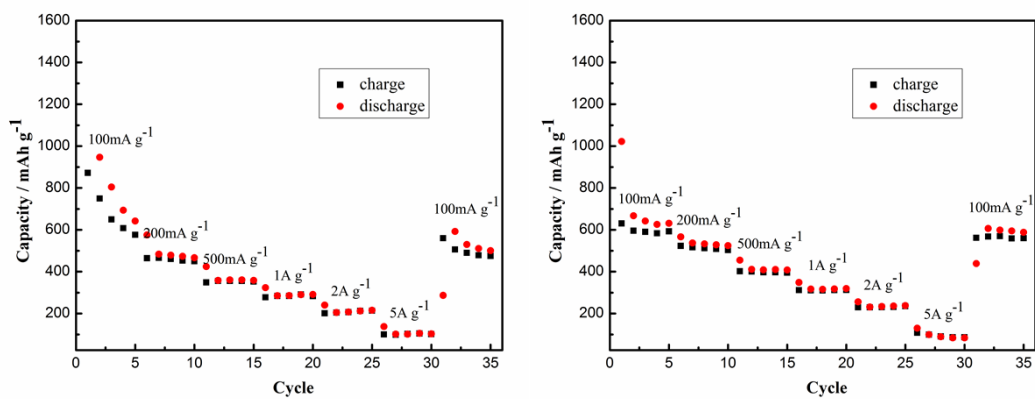

Fig. S7 Rate performances of MnO<sub>2</sub>/HCS-68% and MnO<sub>2</sub>/HCS-35%.
